# Supplementary material for: Efficacy in deceptive vocal exaggeration of human body size
Source: PubMed Central journal article supplement (PMC7881139; doi:10.1038/s41467-021-21008-7), 2021-02-12
Supplement: 41467_2021_21008_MOESM1_ESM.pdf [file 41467_2021_21008_MOESM1_ESM.pdf]

## Supplementary Information for:

## Efficacy in deceptive vocal exaggeration of human body size

Katarzyna Pisanski (kasiapisanski@gmail.com; ORCID 0000-0003-0992-2477)

David Reby (ORCID 0000-0001-9261-1711)

## Supplementary Tables

**Supplementary Table 1.** Absolute acoustic parameters measured from honest and deceptive vocal signals, and percentage change during size deception

| Voice Parameter        | Male vocalisers |                  |          |                 |      | Female vocalisers |                 |      |                 |      |
|------------------------|-----------------|------------------|----------|-----------------|------|-------------------|-----------------|------|-----------------|------|
|                        | Honest          | Attenuating      |          | Exaggerating    |      | Honest            | Attenuating     |      | Exaggerating    |      |
|                        | Mean<br>(SEM)   | Mean<br>(SEM)    | % change | Mean<br>(SEM)   | %    | Mean<br>(SEM)     | Mean<br>(SEM)   | %    | Mean<br>(SEM)   | %    |
| Mean $\Delta F$ , Hz   | 1023.6<br>(2.4) | 1054.0<br>(1.0)  | 3.0      | 954.9<br>(1.8)  | -6.7 | 1195.3<br>(1.4)   | 1215.8<br>(1.7) | 1.7  | 1161.0<br>(1.6) | -2.8 |
| Mean $\Delta F$ , Bark | 8.66<br>(0.01)  | 8.84<br>(0.01)   | 2.1      | 8.25<br>(0.01)  | -4.7 | 9.62<br>(0.01)    | 9.73<br>(0.01)  | 1.1  | 9.50<br>(0.01)  | -1.2 |
| Mean VTL, cm           | 17.18<br>(0.04) | 16.62<br>(0.012) | -3.3     | 18.40<br>(0.04) | 7.1  | 14.66<br>(0.02)   | 14.42<br>(0.02) | -1.6 | 15.10<br>(0.02) | 3.0  |
| Mean $f_0$ , Hz        | 117.3<br>(0.7)  | 121.0<br>(0.6)   | 3.2      | 109.4<br>(0.5)  | -6.7 | 213.8<br>(0.7)    | 231.3<br>(1.0)  | 8.2  | 203.21<br>(0.9) | -5.0 |
| Mean $f_0$ , ERB       | 3.83<br>(0.02)  | 3.93<br>(0.01)   | 2.6      | 3.62<br>(0.01)  | -5.5 | 6.12<br>(0.01)    | 6.47<br>(0.02)  | 5.7  | 5.89<br>(0.02)  | -3.8 |

Mean absolute values (standard error of the mean,  $\pm$ SEM), and percentage change (%) from baseline (honest condition) during vocal size attenuation and exaggeration, where negative percentages indicate a decrease from baseline. Note:  $\Delta F$  = formant spacing; VTL = apparent vocal tract length;  $f_0$  = fundamental frequency in Hertz (Hz). Psychoacoustic auditory rescaling to equivalent rectangular bandwidths (ERBs, where  $E_i = 21.4 * \log_{10}(0.00437 * f_i + 1)$ )<sup>1</sup> and Bark units, where  $Z_i = 26.81 / (1 + 1960 / f_i) - 0.53$ <sup>2</sup>. Measures based on  $n=40$  vocalisers (20 males, 20 females), 120 vocal stimuli (20 per sex, per size condition).

**Supplementary Table 2.** Linear Mixed Models: Sex differences in voice frequency shifts

| Source                         | <i>df</i> 1, <i>df</i> 2 | <i>F</i>   | <i>P</i> | <i>df</i> 1, <i>df</i> 2 | <i>F</i> | <i>P</i> |
|--------------------------------|--------------------------|------------|----------|--------------------------|----------|----------|
| <b>Final Models (a)</b>        |                          | $\Delta F$ |          | $f_0$                    |          |          |
| Intercept                      | 1, 33                    | 24.5       | <.001    | 1, 37                    | 12.8     | .001     |
| Vocaliser sex (exaggerating)   | 1, 33                    | 5.5        | .025     | 1, 37                    | 0.2      | .630     |
| Intercept                      | 1, 32                    | 4.7        | .037     | 1, 37                    | 11.5     | .002     |
| Vocaliser sex (attenuating)    | 1, 32                    | 0.1        | .842     | 1, 37                    | 3.6      | .064     |
| <b>Final Models (b)</b>        |                          | $\Delta F$ |          |                          |          |          |
| Vocaliser sex (exaggerating)   | 1, 30                    | 3.6        | .067     |                          |          |          |
| <b>Omnibus Models</b>          |                          | $\Delta F$ |          | $f_0$                    |          |          |
| Intercept                      | 1, 36.4                  | 3.6        | .064     | 1, 37                    | 0.1      | .816     |
| Size deception                 | 2, 32.9                  | 57.1       | <.001    | 1, 37                    | 38.0     | <.001    |
| Vocaliser sex                  | 1, 36.3                  | 2.0        | .168     | 1, 37                    | 1.0      | .335     |
| Size deception * vocaliser sex | 1, 32.9                  | 6.1        | .019     | 1, 37                    | 5.0      | .032     |

Linear mixed models (LMMs). All models, dependent variable: magnitude of voice frequency shift (difference from ‘honest’ baseline) for each voice frequency parameter (note that analogous results are obtained on ERB and Bark psychoacoustic scales); random variable (with intercept): vocaliser ID. Final models (a), fixed variable: sex of vocaliser (conducted separately for each deceptive size condition); Omnibus model, fixed variables: size deception \* vocaliser sex; Final models (b), same as ‘a’ controlling for vocaliser actual height as a fixed covariate. Significant effects in LMMs were further examined using pairwise tests with Šidák correction for multiple comparisons. All tests two-tailed, alpha 0.05.  $n=40$  vocalisers (20 males, 20 females), 120 vocal stimuli (20 per sex, per size condition).

**Supplementary Table 3.** Relationships between voice frequency shifts and vocaliser height

| Correlation Coefficient | Shift in Voice Parameter | Male vocalisers          |                           | Female vocalisers        |                           |
|-------------------------|--------------------------|--------------------------|---------------------------|--------------------------|---------------------------|
|                         |                          | Size Deception           |                           | Size Deception           |                           |
|                         |                          | Attenuating<br>$r(n, p)$ | Exaggerating<br>$r(n, p)$ | Attenuating<br>$r(n, p)$ | Exaggerating<br>$r(n, p)$ |
| $r_s$                   | Mean $\Delta F$ (Hz)     | 0.34† (15, .108)         | -0.55* (15, .017)         | 0.10 (16, .360)          | 0.29 (14, .154)           |
|                         | Mean $\Delta F$ , Bark   | 0.34† (15, .108)         | -0.55* (15, .017)         | 0.10 (16, .360)          | 0.29 (14, .154)           |
|                         | Mean $f_0$ (Hz)          | 0.19 (17, .233)          | 0.05 (16, .427)           | -0.09 (19, .352)         | -0.29 (17, .126)          |
|                         | Mean $f_0$ , ERB         | 0.19 (17, .233)          | 0.03 (18, .459)           | -0.04 (18, .348)         | -0.29 (19, .119)          |
| $r$                     | Mean $\Delta F$ (Hz)     | 0.37† (16, .077)         | -0.56* (16, .013)         | 0.15 (17, .285)          | 0.26 (16, .167)           |
|                         | Mean $\Delta F$ , Bark   | 0.37 (16, .078)          | -0.56* (16, .013)         | 0.15 (17, .284)          | 0.26 (16, .165)           |
|                         | Mean $f_0$ (Hz)          | 0.28 (18, .130)          | -0.14 (18, .292)          | -0.13 (19, .292)         | -0.28 (18, .130)          |
|                         | Mean $f_0$ , ERB         | 0.28 (18, .129)          | 0.01 (17, .448)           | -0.14 (19, .279)         | -0.27 (18, .139)          |

Spearman  $\rho$  ( $r_s$ ) and Pearson’s  $r$  correlations. Note:  $\Delta F$  = formant spacing;  $f_0$  = fundamental frequency. Psychoacoustic auditory rescaling to equivalent rectangular bandwidths (ERBs, where  $E_i = 21.4 * \log_{10}(0.00437 * f_i + 1)$ )<sup>1</sup> and Bark units, where  $Z_i = 26.81 / (1 + 1960 / f_i) - 0.53$ <sup>2</sup>. Significant effects indicated with \* $p < .05$ , † $p < .010$ , one-tailed,  $n=40$  vocalisers, 15-19 per correlation where Cook’s  $D_i < 0.20$ . Exact  $n$  and  $p$  values are given, respectively, in brackets to the right of each correlation coefficient.

**Supplementary Table 4.** Relationships between absolute voice frequencies and vocaliser height

| Correlation Coefficient | Voice Parameter      | Male vocalisers                  |                                 |                           | Female vocalisers     |                          |                           |
|-------------------------|----------------------|----------------------------------|---------------------------------|---------------------------|-----------------------|--------------------------|---------------------------|
|                         |                      | Honest                           | Size Deception                  |                           | Honest                | Size Deception           |                           |
|                         |                      | $r(n, p)$                        | Attenuating<br>$r(n, p)$        | Exaggerating<br>$r(n, p)$ | $r(n, p)$             | Attenuating<br>$r(n, p)$ | Exaggerating<br>$r(n, p)$ |
| $r_s$                   | Mean $\Delta F$ (Hz) | -0.37 <sup>†</sup><br>(18, .070) | -0.21<br>(17, .220)             | -0.76**<br>(18, <.001)    | -0.63**<br>(19, .002) | -0.41*<br>(16, .042)     | -0.31<br>(18, .110)       |
|                         | Mean $f_0$ (Hz)      | .17<br>(19, .245)                | 0.35<br>(20, .065)              | 0.05<br>(18, .427)        | 0.17<br>(18, .254)    | 0.14<br>(18, .285)       | 0.19<br>(17, .234)        |
| $r$                     | Mean $\Delta F$ (Hz) | -0.35 <sup>†</sup><br>(18, .080) | -0.25<br>(17, .170)             | -0.75**<br>(18, <.001)    | -0.69**<br>(19, .001) | -0.44*<br>(16, .045)     | -0.13<br>(15, .320)       |
|                         | Mean $f_0$ (Hz)      | 0.23<br>(19, .172)               | 0.39 <sup>†</sup><br>(20, .053) | 0.10<br>(18, .354)        | 0.24<br>(18, .166)    | 0.22<br>(18, .196)       | 0.26<br>(17, .154)        |

Spearman  $\rho$  ( $r_s$ ) and Pearson's  $r$  correlations. Note:  $\Delta F$  = formant spacing;  $f_0$  = fundamental frequency. Significant effects indicated with \*\* $p$ <.001, \* $p$ <.05, <sup>†</sup> $p$ <.010, one-tailed,  $n=40$  vocalisers, 16-20 per correlation where Cook's  $Di < 0.20$ . Exact  $n$  and  $p$  values are given, respectively, in brackets below each correlation coefficient.

**Supplementary Table 5.** Linear Mixed Models: Listeners' height judgments (Experiment 1)

| Source                                        | $df1, df2$ | $F$                  | $P$   | $df1, df2$        | $F$   | $P$   |
|-----------------------------------------------|------------|----------------------|-------|-------------------|-------|-------|
| <b>Final Models</b>                           |            | Male vocalisers      |       | Female vocalisers |       |       |
| Intercept                                     | 1, 969     | 5.1                  | .024  | 1, 969            | 10.2  | .001  |
| Size deception                                | 2, 1938.0  | 299.2                | <.001 | 2, 1938.0         | 174.3 | <.001 |
| <b>Omnibus Model</b>                          |            | Both vocaliser sexes |       |                   |       |       |
| Intercept                                     | 1, 1936.5  | 13.8                 | <.001 |                   |       |       |
| Size deception                                | 2, 3872.0  | 439.2                | <.001 |                   |       |       |
| Vocaliser sex                                 | 1, 1936.5  | 0.7                  | .392  |                   |       |       |
| Size deception * vocaliser sex                | 2, 3872.0  | 9.9                  | <.001 |                   |       |       |
| Listener sex                                  | 1, 1945.4  | 0.1                  | .866  |                   |       |       |
| Size deception * listener sex                 | 2, 3872.4  | 0.2                  | .839  |                   |       |       |
| Vocaliser sex * listener sex                  | 1, 1945.4  | 0.4                  | .519  |                   |       |       |
| Size deception * vocaliser sex * listener sex | 2, 3872.4  | 0.1                  | .911  |                   |       |       |

Linear mixed models (LMMs). All models, dependent variable: Error in height judgments (difference perceived – actual vocaliser height); random variables (with intercept): listener ID \* vocaliser ID. Final models, fixed variable: size deception (split by vocaliser sex). Omnibus model, fixed variables: size deception \* vocaliser sex \* listener sex. Significant effects in LMMs were further examined using pairwise tests with Šidák correction for multiple comparisons. All tests two-tailed, alpha 0.05. All data derive from Experiment 1, based on 120 vocal stimuli produced by  $n=40$  vocalisers (20 males, 20 females) in each of three size conditions (honest, attenuating, exaggerating) and judged by  $n=97$  listeners, where each vocal stimulus was rated by an average of 50 listeners (see Methods).

**Supplementary Table 6.** Relationships between voice frequencies and perceived vocaliser height (Experiment 1)

| Correlation Coefficient | Voice Parameter      | Male vocalisers                  |                                  |                           | Female vocalisers                |                                  |                           |
|-------------------------|----------------------|----------------------------------|----------------------------------|---------------------------|----------------------------------|----------------------------------|---------------------------|
|                         |                      | Honest<br>$r(n, p)$              | Size Deception                   |                           | Honest<br>$r(n, p)$              | Size Deception                   |                           |
|                         |                      |                                  | Attenuating<br>$r(n, p)$         | Exaggerating<br>$r(n, p)$ |                                  | Attenuating<br>$r(n, p)$         | Exaggerating<br>$r(n, p)$ |
| $r_s$                   | Mean $\Delta F$ (Hz) | -0.29 <sup>†</sup><br>(17, .128) | 0.16<br>(17, .264)               | -0.59**<br>(20, .003)     | -0.66**<br>(19, .001)            | -0.35 <sup>†</sup><br>(14, .113) | -0.74**<br>(15, .001)     |
|                         | Mean $f_0$ (Hz)      | -0.45*<br>(18, .030)             | -0.35 <sup>†</sup><br>(19, .074) | -0.74**<br>(20, <.001)    | -0.46*<br>(19, .024)             | -0.40*<br>(17, .045)             | -0.49*<br>(18, .020)      |
| $r$                     | Mean $\Delta F$ (Hz) | -.23<br>(17, .184)               | 0.22<br>(17, .200)               | -0.53**<br>(20, .009)     | -0.66**<br>(19, .001)            | -0.46 <sup>†</sup><br>(14, .050) | -0.78**<br>(15, <.001)    |
|                         | Mean $f_0$ (Hz)      | -.30<br>(18, .113)               | -0.53*<br>(17, .014)             | -0.76**<br>(19, <.001)    | -0.38 <sup>†</sup><br>(18, .058) | -0.59**<br>(20, .003)            | -0.61**<br>(18, .003)     |

Spearman  $\rho$  ( $r_s$ ) and Pearson's  $r$  correlations. Note:  $\Delta F$  = formant spacing;  $f_0$  = fundamental frequency. Significant effects indicated with \*\* $p$ <.001, \* $p$ <.05, <sup>†</sup> $p$ <.010, one-tailed,  $n=40$  vocalisers, 14-19 per correlation where Cook's  $Di$  < 0.20. Exact  $n$  and  $p$  values are given, respectively, in brackets below each correlation coefficient.

**Supplementary Table 7.** Linear Mixed Models: Listeners' detection of size deception (Experiment 1)

| Source                                        | <i>df</i> <sub>1</sub> , <i>df</i> <sub>2</sub> | <i>F</i>             | <i>P</i> | <i>df</i> <sub>1</sub> , <i>df</i> <sub>2</sub> | <i>F</i> | <i>P</i> |
|-----------------------------------------------|-------------------------------------------------|----------------------|----------|-------------------------------------------------|----------|----------|
| <b>Final Models (a)</b>                       |                                                 | Male vocalisers      |          | Female vocalisers                               |          |          |
| Intercept                                     | 1, 2907                                         | 3381.5               | <.001    | 1, 2907                                         | 2670.2   | <.001    |
| Size deception                                | 2, 2907                                         | 15.7                 | <.001    | 2, 2907                                         | 28.7     | <.001    |
| <b>Final Models (b)</b>                       |                                                 | Both vocaliser sexes |          |                                                 |          |          |
| Intercept                                     | 1, 1938                                         | 2754.2               | <.001    |                                                 |          |          |
| Vocaliser sex (honest)                        | 2, 1938                                         | 3.1                  | .08      |                                                 |          |          |
| Intercept                                     | 1, 1938                                         | 1824.3               | <.001    |                                                 |          |          |
| Vocaliser sex (exaggerating)                  | 2, 1938                                         | 6.7                  | <.01     |                                                 |          |          |
| Intercept                                     | 1, 1938                                         | 1551.5               | <.001    |                                                 |          |          |
| Vocaliser sex (attenuating)                   | 2, 1938                                         | 14.5                 | <.001    |                                                 |          |          |
| <b>Omnibus Model</b>                          |                                                 | Both vocaliser sexes |          |                                                 |          |          |
| Intercept                                     | 1, 5808.0                                       | 5756.0               | <.001    |                                                 |          |          |
| Size deception                                | 2, 5808.0                                       | 41.0                 | <.001    |                                                 |          |          |
| Vocaliser sex                                 | 1, 5808.0                                       | 23.8                 | <.001    |                                                 |          |          |
| Size deception * vocaliser sex                | 2, 5808.0                                       | 1.0                  | .362     |                                                 |          |          |
| Listener sex                                  | 1, 5808.0                                       | 3.2                  | .075     |                                                 |          |          |
| Size deception * listener sex                 | 2, 5808.0                                       | 1.3                  | .262     |                                                 |          |          |
| Vocaliser sex * listener sex                  | 1, 5808.0                                       | 1.6                  | .200     |                                                 |          |          |
| Size deception * vocaliser sex * listener sex | 2, 5808.0                                       | 0.4                  | .693     |                                                 |          |          |

Linear mixed models (LMMs). All models, dependent variable: Correct detection of size deception (*correctly identified* as honest, exaggerating, or attenuating size); random variables (with intercept): listener ID \* vocaliser ID. Final models a, fixed variable: size deception (split by vocaliser sex); Final models b, fixed variable: vocaliser sex (split by size deception condition); Omnibus model, fixed variables: size deception \* vocaliser sex \* listener sex. Significant effects in LMMs were further examined using pairwise tests with Šidák correction for multiple comparisons. All tests two-tailed, alpha 0.05. All data derive from Experiment 1, based on 120 vocal stimuli produced by  $n=40$  vocalisers (20 males, 20 females) in each of three size conditions (honest, attenuating, exaggerating) and judged by  $n=97$  listeners, where each vocal stimulus was rated by an average of 50 listeners (see Methods).

**Supplementary Table 8.** Linear Mixed Models: Effect of *unprimed* deception detection on ‘error’ in height judgments (difference between perceived and actual vocaliser height) (Experiment 1)

| Source                                                              | <i>df1, df2</i>      | <i>F</i> | <i>P</i> | <i>df1, df2</i>   | <i>F</i> | <i>P</i> |
|---------------------------------------------------------------------|----------------------|----------|----------|-------------------|----------|----------|
| <b>Final Models</b>                                                 |                      |          |          |                   |          |          |
|                                                                     | Male vocalisers      |          |          | Female vocalisers |          |          |
| Intercept                                                           | 1, 974.8             | 6.2      | .013     | 1, 978.5          | 11.1     | .001     |
| Size deception                                                      | 2, 1940.9            | 303.7    | <.001    | 2, 1944.3         | 188.5    | <.001    |
| Deception detection                                                 | 1, 2264.6            | 0.9      | .334     | 1, 2170.2         | 1.2      | .279     |
| Size deception * deception detection                                | 2, 2325              | 15.0     | <.001    | 2, 2344.8         | 16.6     | <.001    |
| <b>Omnibus Model</b>                                                |                      |          |          |                   |          |          |
|                                                                     | Both vocaliser sexes |          |          |                   |          |          |
| Intercept                                                           | 1, 1905.5            | 13.3     | <.001    |                   |          |          |
| Size deception                                                      | 2, 3764.6            | 436.1    | <.001    |                   |          |          |
| Deception detection                                                 | 1, 4300.8            | 1.8      | .179     |                   |          |          |
| Vocaliser sex                                                       | 1, 1905.4            | 0.8      | .369     |                   |          |          |
| Listener Sex                                                        | 1, 1914.5            | 0.2      | .757     |                   |          |          |
| Size deception * deception detection                                | 4, 4528.9            | 31.1     | <.001    |                   |          |          |
| Size deception * vocaliser sex                                      | 2, 3764.6            | 8.1      | <.001    |                   |          |          |
| Size deception * listener sex                                       | 2, 3765.0            | 0.2      | .994     |                   |          |          |
| Deception detection * vocaliser sex                                 | 1, 4300.8            | 0.4      | .503     |                   |          |          |
| Deception detection * listener sex                                  | 1, 4300.9            | 0.2      | .629     |                   |          |          |
| Speaker sex * listener sex                                          | 1, 1914.5            | 0.2      | .664     |                   |          |          |
| Size deception * deception detection * vocaliser sex                | 2, 4528.9            | 1.4      | .258     |                   |          |          |
| Size deception * deception detection * listener sex                 | 2, 4528.8            | 0.2      | .826     |                   |          |          |
| Size deception * vocaliser sex * listener sex                       | 2, 3765.0            | 0.2      | .832     |                   |          |          |
| Deception detection * vocaliser sex * listener sex                  | 1, 4300.9            | 3.2      | .074     |                   |          |          |
| Size deception * deception detection * vocaliser sex * listener sex | 2, 4528.8            | 0.8      | .436     |                   |          |          |

Linear mixed models (LMMs). All models, dependent variable: Error in height judgments (difference between perceived and actual vocaliser height); random variables (with intercept): listener ID \* vocaliser ID. Final models, fixed variables: size deception \* deception detection (split by vocaliser sex). Omnibus model, fixed variables: size deception \* deception detection \* vocaliser sex \* listener sex. Significant effects in LMMs were further examined using pairwise tests with Šidák correction for multiple comparisons. All tests two-tailed, alpha 0.05. All data derive from Experiment 1, based on 120 vocal stimuli produced by  $n=40$  vocalisers (20 males, 20 females) in each of three size conditions (honest, attenuating, exaggerating) and judged by  $n=97$  listeners, where each vocal stimulus was rated by an average of 50 listeners (see Methods).

**Supplementary Table 9.** Linear Mixed Models: Effect of *unprimed* deception detection on ‘deception gain’ (difference between perceived height from deceptive vocal signals and perceived height from honest vocal signals) (Experiment 1)

| Source                                                              | <i>df1, df2</i> | <i>F</i>             | <i>P</i> | <i>df1, df2</i>   | <i>F</i> | <i>P</i> |
|---------------------------------------------------------------------|-----------------|----------------------|----------|-------------------|----------|----------|
| <b>Final Models</b>                                                 |                 | Male vocalisers      |          | Female vocalisers |          |          |
| Intercept                                                           | 1, 967.9        | 5.8                  | .017     | 1, 986.1          | 2.0      | .159     |
| Size deception                                                      | 1, 967.1        | 502.8                | <.001    | 1, 989.2          | 348.2    | <.001    |
| Deception detection                                                 | 1, 1678.6       | 0.1                  | .890     | 1, 1482.9         | 0.1      | .777     |
| Size deception * deception detection                                | 1, 1785.1       | 18.3                 | <.001    | 1, 1758.9         | 26.4     | <.001    |
| <b>Omnibus Model</b>                                                |                 | Both vocaliser sexes |          |                   |          |          |
| Intercept                                                           | 1, 1904.4       | 0.2                  | .644     |                   |          |          |
| Size deception                                                      | 1, 1900.2       | 768.1                | <.001    |                   |          |          |
| Deception detection                                                 | 1, 3049.2       | 0.1                  | .817     |                   |          |          |
| Vocaliser sex                                                       | 1, 1904.4       | 6.8                  | .009     |                   |          |          |
| Listener Sex                                                        | 1, 1904.4       | 0.1                  | .861     |                   |          |          |
| Size deception * deception detection                                | 1, 3453.3       | 45.6                 | <.001    |                   |          |          |
| Size deception * vocaliser sex                                      | 1, 1900.2       | 8.1                  | .005     |                   |          |          |
| Size deception * listener sex                                       | 1, 1900.2       | 0.1                  | .948     |                   |          |          |
| Deception detection * vocaliser sex                                 | 1,3049.2        | 0.4                  | .551     |                   |          |          |
| Deception detection * listener sex                                  | 1, 3049.2       | 0.1                  | .908     |                   |          |          |
| Speaker sex * listener sex                                          | 1, 1904.4       | 0.1                  | .840     |                   |          |          |
| Size deception * deception detection * vocaliser sex                | 1, 3453.3       | 0.3                  | .606     |                   |          |          |
| Size deception * deception detection * listener sex                 | 1, 3453.3       | 0.3                  | .602     |                   |          |          |
| Size deception * vocaliser sex * listener sex                       | 1, 1900.2       | 0.3                  | .578     |                   |          |          |
| Deception detection * vocaliser sex * listener sex                  | 1, 3049.2       | 4.1                  | .054     |                   |          |          |
| Size deception * deception detection * vocaliser sex * listener sex | 1, 3453.3       | 0.1                  | .883     |                   |          |          |

Linear mixed models (LMMs). All models, dependent variable: ‘Detection gain’ in height judgments (difference between perceived height from deceptive signals and perceived height from honest signals); random variables (with intercept): listener ID \* vocaliser ID. Final models, fixed variables: size deception \* deception detection (split by vocaliser sex). Omnibus model, fixed variables: size deception \* deception detection \* vocaliser sex \* listener sex. Significant effects in LMMs were further examined using pairwise tests with Šidák correction for multiple comparisons. All tests two-tailed, alpha 0.05. All data derive from Experiment 1, based on 120 vocal stimuli produced by  $n=40$  vocalisers (20 males, 20 females) in each of three size conditions (honest, attenuating, exaggerating) and judged by  $n=97$  listeners, where each vocal stimulus was rated by an average of 50 listeners (see Methods).

**Supplementary Table 10.** Magnitude of voice frequency shifts as a function of correct detection of deception (Experiment 1)

| Shifted Voice Parameter | Detection of Deception | Male vocalisers |              | Female vocalisers |              |
|-------------------------|------------------------|-----------------|--------------|-------------------|--------------|
|                         |                        | Attenuating     | Exaggerating | Attenuating       | Exaggerating |
| Mean $\Delta F$ , Hz    | Incorrect              | 36.8 (2.5)      | -66.4 (2.7)  | 21.3 (1.4)        | -14.0 (2.3)  |
|                         | Correct                | 13.2 (2.5)      | -70.8 (3.2)  | 15.7 (2.0)        | -44.9 (2.2)  |
| Mean $f_0$ , Hz         | Incorrect              | 6.4 (0.5)       | -3.1 (0.5)   | 16.5 (0.8)        | -8.6 (0.6)   |
|                         | Correct                | 7.5 (0.5)       | -3.4 (0.5)   | 19.0 (1.2)        | -13.0 (0.9)  |

Means (standard error of the mean,  $\pm$ SEM), indicating the magnitude of voice frequency shifts (difference from 'honest' baseline), where positive values indicate raised frequencies, and negative values indicate lowered frequencies. Note:  $\Delta F$  = formant spacing;  $f_0$  = fundamental frequency in Hertz (Hz). Based on  $n=40$  vocalisers (20 males, 20 females), 120 vocal stimuli (20 per sex, per size condition).

**Supplementary Table 11.** Linear Mixed Models: Listeners' height judgments (Experiment 2)

| Source                                        | <i>df1, df2</i> | <i>F</i>             | <i>P</i> | <i>df1, df2</i>   | <i>F</i> | <i>P</i> |
|-----------------------------------------------|-----------------|----------------------|----------|-------------------|----------|----------|
| <b>Final Models</b>                           |                 | Male vocalisers      |          | Female vocalisers |          |          |
| Intercept                                     | 1, 1987         | 0.1                  | .955     | 1, 1978           | 10.5     | .001     |
| Size deception                                | 2, 3956         | 126.2                | <.001    | 2, 3956           | 84.9     | <.001    |
| Listener sex                                  | 1, 1978         | 13.7                 | <.001    | 1, 1978           | 2.0      | .156     |
| Size deception * listener sex                 | 2, 3956         | 6.2                  | .002     | 2, 3956           | 0.1      | .996     |
| <b>Omnibus Model</b>                          |                 | Both vocaliser sexes |          |                   |          |          |
| Intercept                                     | 1, 3956         | 5.4                  | .020     |                   |          |          |
| Size deception                                | 2, 7912         | 205.0                | <.001    |                   |          |          |
| Vocaliser sex                                 | 1, 3956         | 5.8                  | .016     |                   |          |          |
| Size deception * vocaliser sex                | 2, 7912         | 7.3                  | .001     |                   |          |          |
| Listener sex                                  | 1, 3956         | 12.7                 | <.001    |                   |          |          |
| Size deception * listener sex                 | 2, 7912         | 3.1                  | .045     |                   |          |          |
| Vocaliser sex * listener sex                  | 1, 3956         | 2.3                  | .133     |                   |          |          |
| Size deception * vocaliser sex * listener sex | 2, 7912         | 3.3                  | .039     |                   |          |          |

Linear mixed models (LMMs). All models, dependent variable: Error in height judgments (difference perceived – actual vocaliser height); random variables (with intercept): listener ID \* vocaliser ID. Final models, fixed variables: size deception \* listener sex (split by vocaliser sex). Omnibus model, fixed variables: size deception \* vocaliser sex \* listener sex. Significant effects in LMMs were further examined using pairwise tests with Šidák correction for multiple comparisons. All tests two-tailed, alpha 0.05. All data derive from Experiment 2 based on 120 vocal stimuli produced by  $n=40$  vocalisers (20 males, 20 females) in each of three size conditions (honest, attenuating, exaggerating) and judged by  $n=98$  listeners, each of whom rated all vocal stimuli (see Methods). Analogous to Experiment 1 LMMs presented in Supplementary Table 5 above.



**Supplementary Table 12.** Linear Mixed Models: Listeners' detection of size deception (Experiment 2)

| Source                                        | <i>df1, df2</i> | <i>F</i>             | <i>P</i> | <i>df1, df2</i>   | <i>F</i> | <i>P</i> |
|-----------------------------------------------|-----------------|----------------------|----------|-------------------|----------|----------|
| <b>Final Models (a)</b>                       |                 | Male vocalisers      |          | Female vocalisers |          |          |
| Intercept                                     | 1, 5934         | 6457.8               | <.001    | 1, 5934           | 5271.5   | <.001    |
| Size deception                                | 2, 5934         | 120.4                | <.001    | 2, 5934           | 158.0    | <.001    |
| Listener sex                                  | 1, 5934         | 1.3                  | .248     | 1, 5934           | 0.9      | .341     |
| Size deception * listener sex                 | 2, 5934         | 8.3                  | <.001    | 2, 5934           | 5.7      | .003     |
| <b>Final Models (b)</b>                       |                 | Both vocaliser sexes |          |                   |          |          |
| Intercept                                     | 1, 3958         | 7373.7               | <.001    |                   |          |          |
| Vocaliser sex (honest)                        | 1, 3958         | 8.0                  | .005     |                   |          |          |
| Intercept                                     | 1, 3958         | 3034.3               | <.001    |                   |          |          |
| Vocaliser sex (exaggerating)                  | 1, 3958         | 5.8                  | .016     |                   |          |          |
| Intercept                                     | 1, 3958         | 2632.2               | <.001    |                   |          |          |
| Vocaliser sex (attenuating)                   | 1, 3958         | 32.2                 | <.001    |                   |          |          |
| <b>Omnibus Model</b>                          |                 | Both vocaliser sexes |          |                   |          |          |
| Intercept                                     | 1, 11868        | 11703.1              | <.001    |                   |          |          |
| Size deception                                | 2, 11868        | 275.5                | <.001    |                   |          |          |
| Vocaliser sex                                 | 1, 11868        | 34.2                 | <.001    |                   |          |          |
| Size deception * vocaliser sex                | 2, 11868        | 2.7                  | .065     |                   |          |          |
| Listener sex                                  | 1, 11868        | 0.1                  | .882     |                   |          |          |
| Size deception * listener sex                 | 2, 11868        | 12.2                 | <.001    |                   |          |          |
| Vocaliser sex * listener sex                  | 1, 11868        | 2.2                  | .136     |                   |          |          |
| Size deception * vocaliser sex * listener sex | 2, 11868        | 1.8                  | .172     |                   |          |          |

Linear mixed models (LMMs). All models, dependent variable: Correct detection of size deception (*correctly identified* as honest, exaggerating, or attenuating size); random variables (with intercept): listener ID \* vocaliser ID. Final models a, fixed variables: size deception \* listener sex (split by vocaliser sex); Final models b, fixed variable: vocaliser sex (split by size deception condition). Omnibus model, fixed variables: size deception \* vocaliser sex \* listener sex. Significant effects in LMMs were further examined using pairwise tests with Šidák correction for multiple comparisons. All tests two-tailed, alpha 0.05. All data derive from Experiment 2 based on 120 vocal stimuli produced by  $n=40$  vocalisers (20 males, 20 females) in each of three size conditions (honest, attenuating, exaggerating) and judged by  $n=98$  listeners, each of whom rated all vocal stimuli (see Methods). Analogous to Experiment 1 LMMs presented in Supplementary Table 7 above.

**Supplementary Table 13.** Linear Mixed Models: Effect of *primed* deception detection on ‘error’ in height judgments (difference between perceived and actual vocaliser height) (Experiment 2)

| Source                                                              | df1, df2  | F     | P     | df1, df2             | F    | P     |
|---------------------------------------------------------------------|-----------|-------|-------|----------------------|------|-------|
| <b>Final Models (a)</b>                                             |           |       |       | Male vocalisers      |      |       |
| Intercept                                                           | 1, 2018.0 | 1.8   | .181  | 1, 2026.7            | 13.7 | <.001 |
| Size deception                                                      | 2, 3986.4 | 112.1 | <.001 | 2, 3992.1            | 63.8 | <.001 |
| Deception detection                                                 | 1, 4470.5 | 1.7   | .194  | 1, 4314.6            | 0.2  | .657  |
| Size deception * deception detection                                | 2, 4634.1 | 35.3  | <.001 | 2, 4573.1            | 18.4 | <.001 |
| <b>Final Models (b)</b>                                             |           |       |       | Female vocalisers    |      |       |
| <b>Final Models (b)</b>                                             |           |       |       | Male vocalisers      |      |       |
| Intercept (honest)                                                  | 1, 1976.0 | 8.0   | .005  | 1, 1976.0            | 8.5  | .004  |
| Deception detection                                                 | 1, 1976.0 | 22.4  | <.001 | 1, 1976.0            | 13.2 | <.001 |
| Listener sex                                                        | 1, 1976.0 | 10.9  | <.001 | 1, 1976.0            | 0.7  | .387  |
| Deception detection * listener sex                                  | 1, 1976.0 | 0.1   | .905  | 1, 1976.0            | 2.8  | .093  |
| <b>Final Models (b)</b>                                             |           |       |       | Female vocalisers    |      |       |
| Intercept (exaggerating)                                            | 1, 1976.0 | 45.3  | <.001 | 1, 1976.0            | 2.0  | .156  |
| Deception detection                                                 | 1, 1976.0 | 85.9  | <.001 | 1, 1976.0            | 8.3  | .004  |
| Listener sex                                                        | 1, 1976.0 | 25.2  | <.001 | 1, 1976.0            | 1.2  | .265  |
| Deception detection * listener sex                                  | 1, 1976.0 | 0.1   | .763  | 1, 1976.0            | 0.2  | .629  |
| <b>Final Models (b)</b>                                             |           |       |       | Female vocalisers    |      |       |
| Intercept (attenuating)                                             | 1, 1976.0 | 36.0  | <.001 | 1, 1976.0            | 50.3 | <.001 |
| Deception detection                                                 | 1, 1976.0 | 3.2   | .076  | 1, 1976.0            | 15.2 | <.001 |
| Listener sex                                                        | 1, 1976.0 | 2.3   | .127  | 1, 1976.0            | 0.4  | .546  |
| Deception detection * listener sex                                  | 1, 1976.0 | 7.3   | .007  | 1, 1976.0            | 1.9  | .172  |
| <b>Omnibus Model</b>                                                |           |       |       | Both vocaliser sexes |      |       |
| Intercept                                                           | 1, 4032.2 | 7.7   | .006  |                      |      |       |
| Size deception                                                      | 2, 7962.7 | 171.4 | <.001 |                      |      |       |
| Deception detection                                                 | 1, 8782.1 | 0.2   | .641  |                      |      |       |
| Vocaliser sex                                                       | 1, 4032.2 | 4.5   | .033  |                      |      |       |
| Listener Sex                                                        | 1, 4032.2 | 11.9  | .001  |                      |      |       |
| Size deception * deception detection                                | 2, 9187.3 | 47.3  | <.001 |                      |      |       |
| Size deception * vocaliser sex                                      | 2, 7962.7 | 9.27  | <.001 |                      |      |       |
| Size deception * listener sex                                       | 2, 7962.7 | 3.9   | .020  |                      |      |       |
| Deception detection * vocaliser sex                                 | 1, 8782.1 | 2.0   | .155  |                      |      |       |
| Deception detection * listener sex                                  | 1, 8782.1 | 0.1   | .931  |                      |      |       |
| Speaker sex * listener sex                                          | 1, 4032.2 | 2.5   | .114  |                      |      |       |
| Size deception * deception detection * vocaliser sex                | 2, 9187.3 | 3.5   | .029  |                      |      |       |
| Size deception * deception detection * listener sex                 | 2, 9187.3 | 3.8   | .023  |                      |      |       |
| Size deception * vocaliser sex * listener sex                       | 2, 7962.7 | 4.1   | .017  |                      |      |       |
| Deception detection * vocaliser sex * listener sex                  | 1, 8782.1 | 1.2   | .266  |                      |      |       |
| Size deception * deception detection * vocaliser sex * listener sex | 2, 9187.3 | 4.3   | .014  |                      |      |       |

Linear mixed models (LMMs). All models, dependent variable: Error in height judgments (difference between perceived and actual vocaliser height); random variables (with intercept): listener ID \* vocaliser ID. Final models a, fixed variables: size deception \* deception detection (split by vocaliser sex). Final models b, fixed variables: deception detection \* listener sex (split by vocaliser sex and size deception condition). Omnibus model, fixed variables: size deception \* deception detection \* vocaliser sex \* listener sex. Significant effects examined with Šidák corrected pairwise comparisons. All tests two-tailed, alpha 0.05. All data derive from Experiment 2 based on 120 vocal stimuli produced by  $n=40$  vocalisers (20 males, 20 females) in each of three size conditions (honest, attenuating, exaggerating) and judged by  $n=98$  listeners, each of whom rated all vocal stimuli (see Methods). Analogous to Experiment 1 LMMs in Supplementary Table 8 above.

**Supplementary Table 14.** Linear Mixed Models: Effect of *primed* deception detection on ‘deception gain’ (difference between perceived height from deceptive vocal signals and perceived height from honest vocal signals) (Experiment 2)

| Source                                                              | <i>df</i> 1, <i>df</i> 2 | <i>F</i> | <i>P</i> | <i>df</i> 1, <i>df</i> 2 | <i>F</i> | <i>P</i> |
|---------------------------------------------------------------------|--------------------------|----------|----------|--------------------------|----------|----------|
| <b>Final Models (a)</b>                                             |                          |          |          |                          |          |          |
|                                                                     | Male vocalisers          |          |          | Female vocalisers        |          |          |
| Intercept                                                           | 1, 1993.8                | 7.6      | .006     | 1, 2077.7                | 3.1      | .081     |
| Size deception                                                      | 1, 1992.8                | 186.1    | <.001    | 1, 2082.5                | 119.7    | <.001    |
| Deception detection                                                 | 1, 3426.0                | 5.2      | .023     | 1, 3189.5                | 1.8      | .178     |
| Size deception * deception detection                                | 1, 3422.1                | 27.1     | <.001    | 1, 3469.6                | 24.2     | <.001    |
| <b>Final Models (b)</b>                                             |                          |          |          |                          |          |          |
|                                                                     | Male vocalisers          |          |          | Female vocalisers        |          |          |
| Intercept (exaggerating)                                            | 1, 1976.0                | 103.2    | <.001    | 1, 1976.0                | 19.4     | <.001    |
| Deception detection                                                 | 1, 1976.0                | 18.4     | <.001    | 1, 1976.0                | 17.2     | <.001    |
| Listener sex                                                        | 1, 1976.0                | 6.2      | .013     | 1, 1976.0                | .009     | .924     |
| Deception detection * listener sex                                  | 1, 1976.0                | 5.0      | .025     | 1, 1976.0                | .262     | .609     |
| Intercept (attenuating)                                             | 1, 1976.0                | 27.7     | <.001    | 1, 1976.0                | 52.2     | <.001    |
| Deception detection                                                 | 1, 1976.0                | 6.4      | .012     | 1, 1976.0                | 5.1      | .025     |
| Listener sex                                                        | 1, 1976.0                | 3.1      | .077     | 1, 1976.0                | 0.2      | .687     |
| Deception detection * listener sex                                  | 1, 1976.0                | 8.3      | .004     | 1, 1976.0                | 2.9      | .087     |
| <b>Omnibus Model</b>                                                |                          |          |          |                          |          |          |
|                                                                     | Both vocaliser sexes     |          |          |                          |          |          |
| Intercept                                                           | 1, 4056.6                | 0.6      | .456     |                          |          |          |
| Size deception                                                      | 1, 4060.2                | 309.3    | <.001    |                          |          |          |
| Deception detection                                                 | 1, 6568.7                | 6.9      | .009     |                          |          |          |
| Vocaliser sex                                                       | 1, 4056.6                | 10.4     | .001     |                          |          |          |
| Listener Sex                                                        | 1, 4056.6                | 0.1      | .714     |                          |          |          |
| Size deception * deception detection                                | 1, 6923.4                | 43.9     | <.001    |                          |          |          |
| Size deception * vocaliser sex                                      | 1, 4060.2                | 6.3      | .012     |                          |          |          |
| Size deception * listener sex                                       | 1, 4060.2                | 6.3      | .012     |                          |          |          |
| Deception detection * vocaliser sex                                 | 1, 6568.7                | 0.9      | .354     |                          |          |          |
| Deception detection * listener sex                                  | 1, 6568.7                | 0.1      | .744     |                          |          |          |
| Speaker sex * listener sex                                          | 1, 4056.6                | 0.1      | .846     |                          |          |          |
| Size deception * deception detection * vocaliser sex                | 1, 6923.4                | 0.2      | .646     |                          |          |          |
| Size deception * deception detection * listener sex                 | 1, 6923.4                | 2.8      | .092     |                          |          |          |
| Size deception * vocaliser sex * listener sex                       | 1, 4060.2                | 8.2      | .004     |                          |          |          |
| Deception detection * vocaliser sex * listener sex                  | 1, 6568.7                | 1.8      | .175     |                          |          |          |
| Size deception * deception detection * vocaliser sex * listener sex | 1, 6923.4                | 10.4     | .001     |                          |          |          |

Linear mixed models (LMMs). All models, dependent variable: ‘Detection gain’ in height judgments (difference between perceived height from deceptive signals and perceived height from honest signals); random variables (with intercept): listener ID \* vocaliser ID. Final models a, fixed variables: size deception \* deception detection (split by vocaliser sex). Final models b, fixed variables: deception detection \* listener sex (split by vocaliser sex and size deception condition). Omnibus model, fixed variables: size deception \* deception detection \* vocaliser sex \* listener sex. Significant effects examined with Šidák corrected pairwise comparisons. All tests two-tailed, alpha 0.05. All data derive from Experiment 2 based on 120 vocal stimuli produced by  $n=40$  vocalisers (20 males, 20 females) in each of three size conditions (honest, attenuating, exaggerating) and judged by  $n=98$  listeners, each of whom rated all vocal stimuli (see Methods). Analogous to Experiment 1 LMMs presented in Supplementary Table 9 above.

## Supplementary Figures

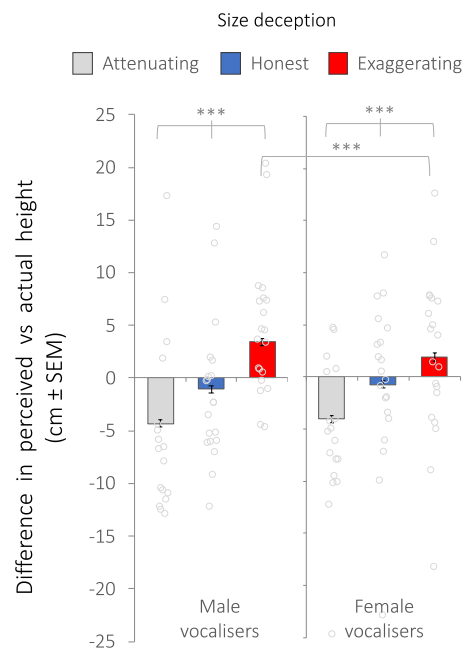

**Supplementary Figure 1. Vocal size deception biases judgments of body size (Experiment 1) – bar graphs with overlaid dot plots.** Bias in height judgments shown as the mean difference ( $\pm$ SEM) between perceived and actual heights of vocalisers, in cm, for honest vocal signals (central blue bars) and deceptive vocal signals (attenuating = grey bars, exaggerating = red bars), where 0 indicates accurate height judgments, positive values indicate overestimation and negative values indicate underestimation. Estimated marginal means and pairwise comparisons derive from linear mixed models, LMMs (see Supplementary Table 5), where all \*\*\*  $p < .001$  following Šidák correction for multiple comparisons. Tests are two-tailed. Error bars represent standard errors of the mean,  $\pm$ SEM. All data derive from Experiment 1, based on 120 vocal stimuli produced by  $n=40$  vocalisers (20 males, 20 females) in each of three size conditions (honest, attenuating, exaggerating) and judged by  $n=97$  listeners, where each vocal stimulus was rated by an average of 50 listeners (see Methods). Overlaid dot plots show the full distribution across vocalisers, each dot representing a single vocaliser with raw difference scores averaged across listeners and within vocalisers of each sex. Source data are provided as a Source Data file.

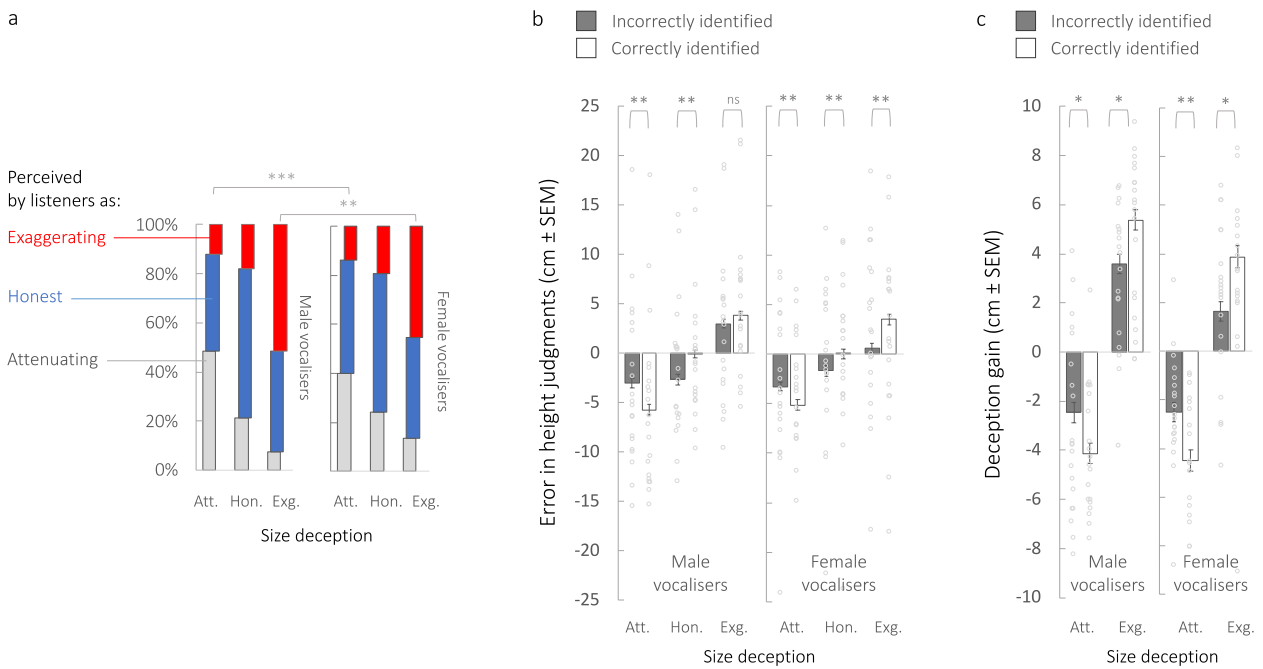

**Supplementary Figure 2. Listeners can detect deception, but remain deceived by deceptive signals (Experiment 1) – bar graphs with overlaid dot plots.** (a) Percentages of vocalisers that listeners perceived as deceptively exaggerating (red bars) or attenuating (light grey bars) their size, or as producing honest vocal signals (blue bars, center) are shown along the y-axis as a function of intended size deception indicated along the x-axis. Estimated marginal means and pairwise comparisons derive from LMMs (see Supplementary Table 7), where \*\*\*  $p < .001$ , \*\*  $p < .01$ , following Šidák correction for multiple comparisons. Tests are two-tailed. (b-c) Bias in listeners' size assessments as a function of whether a listener failed to detect (dark grey bars) or correctly detected (white bars) a vocal signal as deceptive or honest, where panel b shows 'error' in height judgments (mean difference between perceived vs actual heights of vocalisers), and panel c shows 'deception gain' in height judgments (mean difference between perceived height from honest signals and perceived height from deceptive signals). Estimated marginal means and pairwise comparisons derive from LMMs (see Supplementary Tables 8 and 9), \*\*  $p < .01$ , \*  $p < .05$  following Šidák correction. Tests are two-tailed. Error bars,  $\pm$ SEM. Overlaid dot plots show the full distribution across vocalisers, each dot representing a single vocaliser ( $n=40$ , 20 males, 20 females) with raw difference scores averaged across listeners (on average 50 per datapoint) and within vocalisers of each sex. Acronyms: Att. (attenuating); Hon. (honest); Exg. (exaggerating). All data derive from Experiment 1, based on 120 vocal stimuli produced by  $n=40$  vocalisers (20 males, 20 females) in each of three size conditions (honest, attenuating, exaggerating) and judged by  $n=97$  listeners, where each vocal stimulus was rated by an average of 50 listeners (see Methods). Source data are provided as a Source Data file.

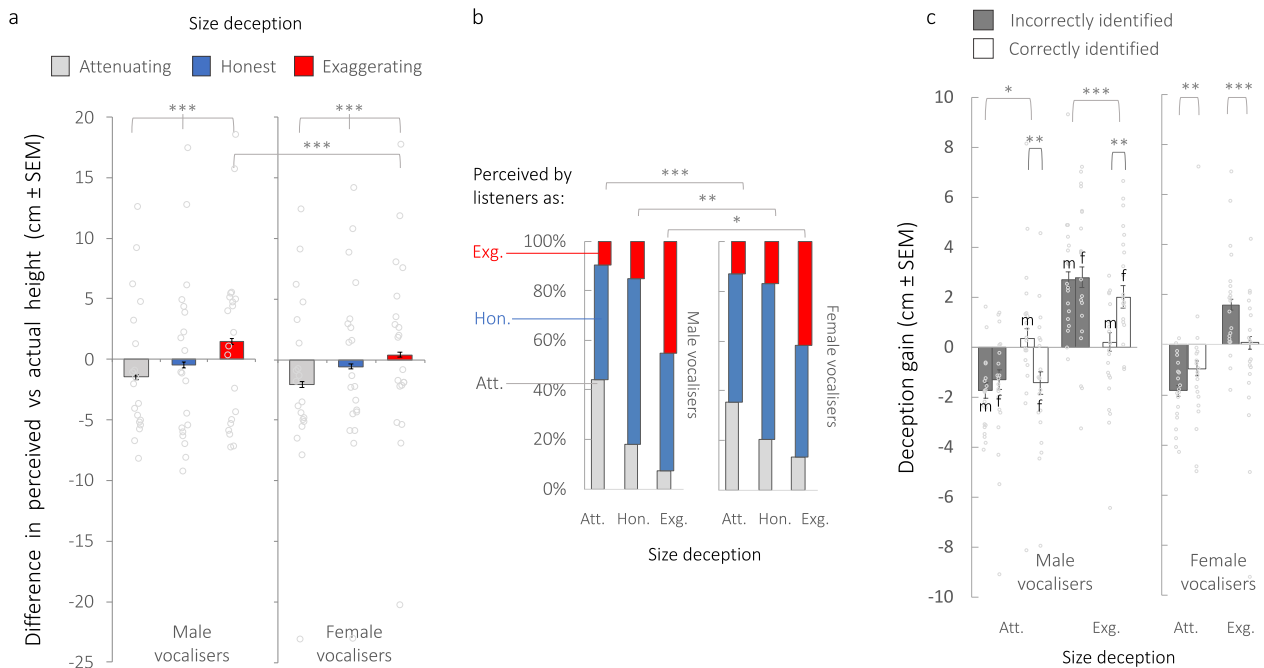

**Supplementary Figure 3. Awareness reduces bias: Listeners recalibrate height judgments for signals correctly and concurrently detected as deceptive (Experiment 2) – bar graphs with overlaid dot plots.**

(a) Bias in height judgments shown as the mean difference ( $\pm$ SEM) between perceived and actual heights of vocalisers, in cm, for honest vocal signals (blue bars) and deceptive vocal signals (attenuating = grey bars, exaggerating = red bars). Estimated marginal means and pairwise comparisons derive from LMMs (see Supplementary Table 11), where all  $*** p < .001$  following Šidák correction for multiple comparisons. Error bars,  $\pm$ SEM. (b) Percentages of vocalisers that listeners perceived as deceptively exaggerating (red bars) or attenuating (light grey bars) their size, or as producing honest vocal signals (blue bars, center) are shown along the y-axis as a function of intended size deception indicated along the x-axis. Estimated marginal means and pairwise comparisons derive from LMMs (see Supplementary Table 12), where  $*** p < .001$ ,  $** p < .01$ ,  $* p < .05$  following Šidák correction. Tests are two-tailed. (c-d). Bias in listeners' size assessments as a function of whether a listener failed to detect (dark grey bars) or correctly detected (white bars) a vocal signal as deceptive or honest, where panel c shows 'error' in height judgments (mean difference between perceived vs actual heights of vocalisers), and panel d shows 'deception gain' in height judgments (mean difference between perceived height from honest signals and perceived height from deceptive signals). Panel d also illustrates the lower degree of deception gain for male vocalisers (left side) when correctly detected as cheating by other male listeners (labelled with 'm') compared to when detected by female listeners ('f'). Estimated marginal means and pairwise comparisons derive from LMMs (see Supplementary Tables 13 and 14,  $*** p < .001$ ,  $** p < .01$ ,  $* p < .05$  following Šidák correction. Overlaid dot plots show the full distribution across vocalisers, each dot representing a single vocaliser ( $n=40$ , 20 males, 20 females), with raw difference scores averaged across listeners ( $n=98$ ) and within vocalisers of each sex; and in the case of male vocalisers in panel c, also within each listener sex, where  $n=59$  male listeners, 39 female listeners. All tests are two-tailed. Error bars,  $\pm$ SEM. Acronyms: Att. (attenuating); Hon. (honest); Exg. (exaggerating); m (male listeners); f (female listeners). All data derive from Experiment 2 based on 120 vocal stimuli produced by  $n=40$  vocalisers (20 males, 20 females) in each of three size conditions (honest, attenuating, exaggerating) and judged by  $n=98$  listeners, each of whom rated all 120 vocal stimuli (see Methods). Source data are provided as a Source Data file.

## Supplementary References

1. Glasberg, B. R. & Moore, B. C. Derivation of auditory filter shapes from notched-noise data. *Hear. Res.* **47**, 103–138 (1990).
2. Traunmüller, H. *Auditory scales of frequency representation*. (1997). [online tutorial]
