# Supplementary material for: Efficacy in deceptive vocal exaggeration of human body size
Source: PubMed Central journal article supplement (PMC7881139; doi:10.1038/s41467-021-21008-7), 2021-02-12
Supplement: 41467_2021_21008_MOESM4_ESM.pdf [file 41467_2021_21008_MOESM4_ESM.pdf]

### **Description of Additional Supplementary Files**

File name: Supplementary Data 1

Description: This dataset includes all raw data from Experiment 1 (spreadsheet 2) and Experiment 2 (spreadsheet 3) with a corresponding legend (spreadsheet 1).
